# Supplementary material for: Prognostic value and potential biological functions of ferroptosis-related gene signature in bladder cancer
Source: PubMed Central journal article supplement — Oncol Lett. 2022 Jul 5;24(3):301. doi: 10.3892/ol.2022.13421 (PMC9353228; doi:10.3892/ol.2022.13421), 2022-07-05
Supplement: Supplementary_Data2.pdf [file Supplementary_Data2.pdf]

Table SI. Ferroptosis-related genes.

| Gene    | Definition                                                 |
|---------|------------------------------------------------------------|
| ACSL4   | Acyl-CoA synthetase long chain family member 4             |
| AKR1C1  | Aldo-keto reductase family 1 member C1                     |
| AKR1C2  | Aldo-keto reductase family 1 member C2                     |
| AKR1C3  | Aldo-keto reductase family 1 member C3                     |
| ALOX15  | Arachidonate 15-lipoxygenase                               |
| ALOX5   | Arachidonate 5-lipoxygenase                                |
| ALOX12  | Arachidonate 12-lipoxygenase                               |
| ATP5MC3 | ATP synthase membrane subunit C locus 3                    |
| CARS1   | Cysteinyl-tRNA synthetase 1                                |
| CBS     | Cystathionine beta-synthase                                |
| CD44    | CD44 molecule (Indian blood group)                         |
| CHAC1   | ChaC glutathione specific gamma-glutamylcyclotransferase 1 |
| CISD1   | CDGSH iron sulfur domain 1                                 |
| CS      | Citrate synthase                                           |
| DPP4    | Dipeptidyl-peptidase 4                                     |
| FANCD2  | FA complementation group D2                                |
| GCLC    | Glutamate-cysteine ligase catalytic subunit                |
| GCLM    | Glutamate-cysteine ligase modifier subunit                 |
| GLS2    | Glutaminase 2                                              |
| GPX4    | Glutathione peroxidase 4                                   |
| GSS     | Glutathione synthetase                                     |
| HMGCR   | 3-hydroxy-3-methylglutaryl-CoA reductase                   |
| HSPB1   | Heat shock protein family B (small) member 1               |
| CRYAB   | Crystallin alpha B                                         |
| LPCAT3  | Lysophosphatidylcholine acyltransferase 3                  |
| MT1G    | Metallothionein 1G                                         |
| NCOA4   | Nuclear receptor coactivator 4                             |

---

|         |                                                     |
|---------|-----------------------------------------------------|
| PTGS2   | Prostaglandin-endoperoxide synthase 2               |
| RPL8    | Ribosomal protein L8                                |
| SAT1    | Spermidine/spermine N1-acetyltransferase 1          |
| SLC7A11 | Solute carrier family 7 member 11                   |
| FDFT1   | Farnesyl-diphosphate farnesyltransferase 1          |
| TFRC    | Transferrin receptor                                |
| TP53    | Tumor protein p53                                   |
| EMC2    | ER membrane protein complex subunit 2               |
| AIFM2   | Apoptosis inducing factor mitochondria associated 2 |
| PHKG2   | Phosphorylase kinase catalytic subunit gamma 2      |
| HSBP1   | Heat shock factor binding protein 1                 |
| ACO1    | Aconitase 1                                         |
| FTH1    | Ferritin heavy chain 1                              |
| STEAP3  | STEAP family member 3                               |
| NFS1    | NFS1 cysteine desulfurase                           |
| ACSL3   | Acyl-coa synthetase long chain family member 3      |
| ACACA   | Acetyl-coa carboxylase alpha                        |
| PEBP1   | Phosphatidylethanolamine binding protein 1          |
| ZEB1    | Zinc finger E-box binding homeobox 1                |
| SQLE    | Squalene epoxidase                                  |
| FADS2   | Fatty acid desaturase 2                             |
| NFE2L2  | NFE2 like bZIP transcription factor 2               |
| KEAP1   | Kelch like ECH associated protein 1                 |
| NQO1    | NAD(P)H quinone dehydrogenase 1                     |
| NOX1    | NADPH oxidase 1                                     |
| ABCC1   | ATP binding cassette subfamily C member 1           |
| SLC1A5  | Solute carrier family 1 member 5                    |
| GOT1    | Glutamic-oxaloacetic transaminase 1                 |
| G6PD    | Glucose-6-phosphate dehydrogenase                   |

---

---

|       |                                           |
|-------|-------------------------------------------|
| PGD   | Phosphogluconate dehydrogenase            |
| IREB2 | Iron responsive element binding protein 2 |
| HMOX1 | Heme oxygenase 1                          |
| ACSF2 | Acyl-CoA synthetase family member 2       |

---

Table SII. Results of univariate independent prognostic analysis of ferroptosis-related genes.

| ID      | HR       | Lower 95%<br>confidence limit | Higher 95%<br>confidence limit | P-value  |
|---------|----------|-------------------------------|--------------------------------|----------|
| ACSL4   | 0.978835 | 0.955235                      | 1.003017                       | 0.085793 |
| AKR1C1  | 1.002375 | 0.998935                      | 1.005827                       | 0.176151 |
| AKR1C2  | 1.000439 | 0.998381                      | 1.002501                       | 0.675969 |
| AKR1C3  | 1.000656 | 0.998799                      | 1.002517                       | 0.488843 |
| ALOX15  | 0.97761  | 0.907662                      | 1.052947                       | 0.54994  |
| ALOX5   | 0.988159 | 0.979712                      | 0.996679                       | 0.00654  |
| ALOX12  | 0.990585 | 0.94743                       | 1.035705                       | 0.677227 |
| ATP5MC3 | 1.004006 | 0.989494                      | 1.018732                       | 0.590409 |
| CARS1   | 0.977721 | 0.917975                      | 1.041356                       | 0.483716 |
| CBS     | 1.183744 | 0.787364                      | 1.779675                       | 0.417466 |
| CD44    | 1.001903 | 0.999473                      | 1.004339                       | 0.124953 |
| CHAC1   | 0.997721 | 0.958446                      | 1.038605                       | 0.911325 |
| CISD1   | 1.033571 | 0.997947                      | 1.070467                       | 0.065019 |
| CS      | 1.007401 | 0.990403                      | 1.024691                       | 0.395721 |
| DPP4    | 1.003948 | 0.976525                      | 1.032141                       | 0.780351 |
| FANCD2  | 0.937503 | 0.874372                      | 1.005192                       | 0.069622 |
| GCLC    | 1.003841 | 0.994431                      | 1.013339                       | 0.425012 |
| GCLM    | 1.00685  | 0.998918                      | 1.014846                       | 0.090725 |
| GLS2    | 0.978977 | 0.427535                      | 2.241679                       | 0.959911 |
| GPX4    | 0.998305 | 0.995483                      | 1.001136                       | 0.240327 |
| GSS     | 0.99975  | 0.99388                       | 1.005654                       | 0.933617 |
| HMGCR   | 1.03493  | 1.007808                      | 1.062781                       | 0.011278 |
| HSPB1   | 1.000066 | 0.999833                      | 1.0003                         | 0.578128 |
| CRYAB   | 1.005697 | 0.995916                      | 1.015575                       | 0.254603 |
| LPCAT3  | 1.018375 | 0.975577                      | 1.063049                       | 0.405857 |

---

|         |          |          |          |          |
|---------|----------|----------|----------|----------|
| MT1G    | 0.997908 | 0.991664 | 1.004191 | 0.513098 |
| NCOA4   | 1.007676 | 0.997156 | 1.018307 | 0.15327  |
| PTGS2   | 0.997135 | 0.989194 | 1.00514  | 0.481852 |
| RPL8    | 0.999912 | 0.999553 | 1.000271 | 0.630711 |
| SAT1    | 0.998974 | 0.997116 | 1.000835 | 0.279526 |
| SLC7A11 | 1.007365 | 0.9977   | 1.017124 | 0.135725 |
| FDFT1   | 0.997759 | 0.991504 | 1.004053 | 0.484314 |
| TFRC    | 1.002183 | 0.998308 | 1.006074 | 0.269891 |
| TP53    | 1.009296 | 0.996401 | 1.022358 | 0.158423 |
| EMC2    | 1.032934 | 0.989083 | 1.078728 | 0.143194 |
| AIFM2   | 0.960622 | 0.911908 | 1.011938 | 0.130275 |
| PHKG2   | 0.971731 | 0.909147 | 1.038624 | 0.398531 |
| HSBP1   | 0.998071 | 0.969373 | 1.027619 | 0.896798 |
| ACO1    | 1.003493 | 0.968053 | 1.04023  | 0.849253 |
| FTH1    | 1.000672 | 0.999749 | 1.001595 | 0.153429 |
| STEAP3  | 0.993877 | 0.979022 | 1.008957 | 0.424067 |
| NFS1    | 1.001825 | 0.924021 | 1.086179 | 0.964749 |
| ACSL3   | 1.009322 | 0.986874 | 1.032281 | 0.418768 |
| ACACA   | 1.037728 | 0.993948 | 1.083436 | 0.092194 |
| PEBP1   | 0.999532 | 0.998557 | 1.000508 | 0.347123 |
| ZEB1    | 1.034222 | 0.975036 | 1.097001 | 0.263081 |
| SQLE    | 1.009502 | 1.001211 | 1.017861 | 0.0246   |
| FADS2   | 1.007477 | 0.997148 | 1.017914 | 0.156549 |
| NFE2L2  | 1.000044 | 0.988676 | 1.011542 | 0.994017 |
| KEAP1   | 0.991494 | 0.974833 | 1.00844  | 0.323197 |
| NQO1    | 1.001461 | 0.999597 | 1.003328 | 0.124544 |
| NOX1    | 0.843032 | 0.722803 | 0.983258 | 0.029628 |
| ABCC1   | 1.010577 | 1.000873 | 1.020376 | 0.032588 |
| SLC1A5  | 1.002833 | 1.000807 | 1.004863 | 0.00611  |

---

---

|       |          |          |          |          |
|-------|----------|----------|----------|----------|
| GOT1  | 1.000243 | 0.984731 | 1.015999 | 0.975725 |
| G6PD  | 1.002658 | 1.000583 | 1.004737 | 0.012006 |
| PGD   | 1.001017 | 0.99971  | 1.002325 | 0.127374 |
| IREB2 | 1.024788 | 0.944628 | 1.111752 | 0.555716 |
| HMOX1 | 1.000539 | 0.997613 | 1.003475 | 0.718329 |
| ACSF2 | 0.99471  | 0.982709 | 1.006857 | 0.391753 |

---

HR, hazard ratio.
